# Supplementary material for: Polycyclic aromatic hydrocarbons with molecular weight 302 in PM2.5 at two industrial sites in South China
Source: Royal Society of Chemistry journal article supplement (doi:10.1039/c1em10320b), 2011-01-01
Supplement: c1em10320b.pdf [file c1em10320b.pdf]

## Supplementary Material

### Polycyclic aromatic hydrocarbons with molecular weight 302 in PM<sub>2.5</sub> at two industrial sites of South China

Shilong Wei<sup>1,2</sup>, Ming Liu<sup>1,2</sup>, Bo Huang<sup>1,2</sup>, Xinhui Bi<sup>1,\*</sup>, Guoying Sheng<sup>1</sup>, Jiamo Fu<sup>1,3</sup>

1. State Key Laboratory of Organic Geochemistry, Guangdong Province Key Laboratory of  
Utilization and Protection of Environmental Resource, Guangzhou Institute of Geochemistry,  
Chinese Academy of Sciences, Guangzhou, 510640, P.R. China

2. Graduate University of Chinese Academy of Sciences, Beijing 100039, P. R. China

3. School of Environmental and Chemical Engineering, Shanghai University, Shanghai  
200444, P. R. China

\*Corresponding author: Xinhui Bi

E-mail: [bixh@gig.ac.cn](mailto:bixh@gig.ac.cn)

Tel: +86-20-85290195

Fax: +86-20-85290288

## 1. Materials and Methods

### 1.1 Reagents

Sixteen priority PAHs (16 compounds specified on EPA Method 610) in a mixture and surrogate consisting of naphthalene-d8; acenaphthene-d10; phenanthrene-d10; chrysene-d12 and perylene-d12 standards were obtained from Cambridge Isotope Laboratories, Inc. Hexamethylbenzene, and coronene-d12 were acquired initially as a solid from Aldrich Chemical.

Five high molecular weight (HMW) PAH isomers, including dibenzo[a,e]fluoranthene (DBaef), dibenzo[a,l]pyrene (DBalP), dibenzo[a,e]pyrene (DBaeP), dibenzo[a,i]pyrene (DBaiP), dibenzo[a,h]pyrene (DBaehP) were obtained from AccuStandard, Inc and Acros Organics. There are 14 other isomer compounds that were also quantified by using the average response factors (Schubert et al., 2003) including dibenzo[b,e]fluoranthene (DBbef), naphtho[1,2-b]fluoranthene (N12bF), naphtho[1,2-k]fluoranthene (N12kF), dibenzo[b,k]fluoranthene (DBbkF), dibenzo[a,k]fluoranthene (DBakF), dibenzo[j,l]fluoranthene (DBjlf), naphtho[1,2-e]pyrene (N12eP), naphtho[2,3-k]fluoranthene (N23kF), naphtho[1,2-a]pyrene (N12aP), naphtho[2,3-e]pyrene (N23eP), naphtho[2,1-a]pyrene (N21aP), dibenzo[e,l]pyrene (DBelp), naphtho[2,3-a]pyrene (N23aP), benzo[b]perylene (BbPer).

### 1.2 Extraction

Prior to extraction, deuterated surrogate standards consisting of naphthalene-d8, acenaphthylene-d10, phenanthrene-d10, chrysene-d12, perylene-d12, and dibenzo[a,i]-pyrene-d14 were spiked onto the filters. Filters were extracted with 60 mL dichloromethane (DCM) using ultrasonic agitation under 30 °C and filtered. The procedure was repeated three times. The combined extracts were filtered and concentrated by rotary evaporation under vacuum. Each sample was concentrated to about 0.5 mL. Interfering compounds were removed by liquid-solid chromatography using 2:1 silica-alumina column. Two fractions were eluted. Fraction I (40mL of hexane) contained the aliphatic hydrocarbons, while fraction II (100mL of DCM-hexane (1:1)) contained the priority PAHs and HMW PAHs. Then under a gentle stream of nitrogen the samples were reduced almost to dryness and redissolved with n-hexane. Internal standards hexamethylbenzene (for priority PAHs) and coronene-d12 (for HMW PAHs) was added at this point.

### 1.3. Instrumental Analysis

All samples were analyzed using gas chromatography with mass selective detection (GC/MS). For priority PAHs analysis, the mass spectrometer used electron impact ionization (EI) and selected ion monitoring (SIM) mode. A DB-17MS capillary column (60 m × 0.25 mm × 0.25 µm) was used. The chromatographic conditions were as follows: injector temperature was 290 °C and detector temperature was 220 °C. The temperature ramp was: an initial oven temperature of 60 °C maintained for 5min, and increased at 6 °C

59 min<sup>-1</sup> to a maximum of 300 °C for 45 min. Helium was the carrier gas at a flow rate of 1.0  
60 mL min<sup>-1</sup>.

61 For nineteen PAH isomers with MW 302 were quantified with MS operated in electron  
62 impact ion (EI) mode and selected ion monitoring (SIM). GC was equipped with a  
63 DB-17MS capillary column (60 m × 0.25 mm × 0.25 µm). The chromatographic conditions  
64 were as follows: injector temperature was 290 °C and detector temperature was 230 °C. The  
65 temperature ramp was: isothermal at 100 °C for 1 min, with 45 °C/min to 200 °C, with 2  
66 °C/min to 310 °C, isothermal at 310 °C for 75 min, then with 45 °C/min to 320 °C, isothermal  
67 at 320 °C for 10 min. The helium was chosen as carrier gas (at a flow rate of 1.2 mL/min).

68 Chromatographic peaks of samples were identified based on the molecular ions and  
69 retention times. Concentrations of individual PAH isomers were quantified using the  
70 corresponding deuterated internal standard. The relative response factors to the internal  
71 standard were calculated with the 8-point calibration curve method.

72

#### 73 1.4. Quality control (QC) and quality assurance (QA)

74 Field blanks, which accompanied the field samples to the sampling sites, were used to  
75 determine any background contamination. Solvent blanks were analyzed. The  
76 concentrations of target compounds in the blanks were under the instrument detection.  
77 Therefore, the results were not corrected for field blanks. In addition, surrogate standards  
78 were added to all the samples (including QA samples) to monitor procedural performance and

79 matrix effects. The mean recovery of dibenzo[a,i]pyrene-d14 for the HMW PAHs was  
80 79.9%.  
81

82

Table S1. Meteorological parameters, PM2.5 and EC during sampling period

| Date          | Temperature<br>(°C) | Humidity<br>(%) | Wind speed<br>(m s <sup>-1</sup> ) | PM2.5(site A)<br>(µg m <sup>-3</sup> ) | PM2.5 (site B)<br>(µg m <sup>-3</sup> ) | EC(site A)<br>(µg m <sup>-3</sup> ) | EC(site B)<br>(µg m <sup>-3</sup> ) |
|---------------|---------------------|-----------------|------------------------------------|----------------------------------------|-----------------------------------------|-------------------------------------|-------------------------------------|
| <b>Summer</b> |                     |                 |                                    |                                        |                                         |                                     |                                     |
| Aug 5 Day     | 28                  | 87              | 3.6                                | 24.2                                   | 28.2                                    | 1.90                                | 1.42                                |
| Aug 5 Night   | 27                  | 91              | 3.6                                | 26.4                                   | 29.3                                    | 1.05                                | 1.43                                |
| Aug 6 Day     | 26                  | 91              | 2.5                                | 29.8                                   | 32.6                                    | 2.25                                | 1.85                                |
| Aug 6 Night   | 26                  | 94              | 0.8                                | 40.6                                   | 63.9                                    | 2.92                                | 2.98                                |
| Aug 7 Day     | 34                  | 60              | 3.6                                | 46.6                                   | 37.6                                    | 2.93                                | 1.32                                |
| Aug 7 Night   | 30                  | 72              | 2.4                                | 49.5                                   | 47.0                                    | 1.91                                | 3.06                                |
| Aug 8 Day     | 33                  | 61              | 3.5                                | 49.4                                   | 32.6                                    | 3.09                                | 1.25                                |
| Aug 8 Night   | 30                  | 70              | 2.6                                | 32.8                                   | 35.8                                    | 0.92                                | 1.95                                |
| Aug 9 Day     | 33                  | 62              | 2.5                                | 41.5                                   | 25.2                                    | 2.50                                | 1.22                                |
| Aug 9 Night   | 28                  | 83              | 0.7                                | 37.3                                   | 70.9                                    | 0.98                                | 4.94                                |
| Aug 10 Day    | 34                  | 57              | 2.2                                | 41.4                                   | 41.1                                    | 2.08                                | 2.13                                |
| Aug 10 Night  | 30                  | 71              | 2.7                                | 39.3                                   | 51.1                                    | 1.00                                | 1.98                                |
| Aug 11 Day    | 32                  | 66              | 1.7                                | 50.9                                   | 111                                     | 2.17                                | 2.67                                |
| Aug 11 Night  | 27                  | 89              | 2.2                                | 34.9                                   |                                         | 1.16                                |                                     |
| Aug 12 Day    | 28                  | 86              | 1.4                                | 42.3                                   |                                         | 1.66                                |                                     |
| Aug 12 Night  | 26                  | 90              | 1.1                                | 60.6                                   | 50.9                                    | 2.31                                | 1.24                                |
| Aug 13 Day    | 29                  | 79              | 2.4                                | 64.8                                   | 65.0                                    | 2.80                                | 2.26                                |
| Aug 13 Night  | 28                  | 86              | 1.9                                | 80.5                                   | 67.8                                    | 3.63                                | 3.34                                |
| Aug 14 Day    | 29                  | 83              | 2.4                                | 72.2                                   | 50.7                                    | 1.93                                | 2.25                                |
| Aug 14 Night  | 27                  | 92              | 0.9                                | 66.5                                   | 86.3                                    | 2.74                                | 3.69                                |
| Aug 15 Day    | 32                  | 68              | 2.2                                | 74.4                                   | 52.8                                    | 1.90                                | 2.19                                |
| Aug 15 Night  | 29                  | 83              | 0.6                                | 97.5                                   | 80.5                                    | 2.80                                | 2.91                                |
| Aug 16 Day    | 33                  | 62              | 2.6                                | 58.4                                   | 57.1                                    | 1.54                                | 2.43                                |
| Aug 16 Night  | 30                  | 77              | 2.2                                | 50.7                                   | 62.8                                    | 1.53                                | 1.08                                |
| <b>Winter</b> |                     |                 |                                    |                                        |                                         |                                     |                                     |
| Jan 24 Night  | 10                  | 95              | 2.0                                | 53.6                                   | 52.1                                    | 3.48                                | 1.78                                |
| Jan 25 Day    | 15                  | 73              | 7.4                                | 68.4                                   | 40.4                                    | 1.71                                | 1.19                                |
| Jan 25 Night  | 11                  | 74              | 6.2                                | 44.2                                   | 51.9                                    | 0.71                                | 0.95                                |
| Jan 26 Day    | 14                  | 63              | 2.6                                | 81.1                                   | 77.0                                    | 1.90                                | 1.18                                |
| Jan 26 Night  | 13                  | 79              | 0.9                                | 131                                    | 147                                     | 5.97                                | 3.73                                |
| Jan 27 Day    | 14                  | 91              | 0.9                                | 163                                    | 200                                     | 7.08                                | 4.46                                |
| Jan 27 Night  | 14                  | 97              | 1.1                                | 164                                    | 148                                     | 9.57                                | 5.58                                |
| Jan 28 Day    | 19                  | 82              | 1.9                                | 138                                    | 140                                     | 6.24                                | 4.38                                |
| Jan 28 Night  | 18                  | 92              | 2.0                                | 199                                    | 266                                     | 6.97                                | 7.43                                |
| Jan 29 Day    | 20                  | 88              | 1.9                                | 185                                    | 185                                     | 7.12                                | 5.95                                |
| Jan 29 Night  | 18                  | 86              | 2.4                                | 142                                    | 114                                     | 4.91                                | 4.62                                |
| Jan 30 Day    | 20                  | 75              | 1.6                                | 188                                    | 179                                     | 4.88                                | 4.38                                |
| Jan 30 Night  | 20                  | 84              | 1.7                                | 160                                    | 131                                     | 7.06                                | 4.60                                |

|              |    |    |     |      |      |      |      |
|--------------|----|----|-----|------|------|------|------|
| Jan 31 Day   | 22 | 78 | 1.4 | 178  | 112  | 5.15 | 3.13 |
| Jan 31 Night | 20 | 86 | 1.3 | 142  | 108  | 6.44 | 4.76 |
| Feb 1 Day    | 21 | 78 | 2.0 | 97.1 | 117  | 2.80 | 2.92 |
| Feb 1 Night  | 19 | 78 | 2.9 | 88.6 | 101  | 2.69 | 4.04 |
| Feb 2 Day    | 20 | 81 | 2.0 | 139  | 89.5 | 6.21 | 3.21 |
| Feb 2 Night  | 19 | 88 | 3.3 | 83.2 | 93.2 | 4.34 | 3.91 |
| Feb 3 Day    | 14 | 93 | 3.1 | 44.1 | 51.8 | 3.35 | 1.80 |
| Feb 3 Night  | 13 | 94 | 3.8 | 22.5 | 23.5 | 1.63 | 1.28 |

83

84

85

Table S2. The *p* values for non-parametric Mann-Whitney *U* test

| Compounds | Sites A and B | Summer and winter |        | Day and night |        |
|-----------|---------------|-------------------|--------|---------------|--------|
|           |               | Site A            | Site B | Site A        | Site B |
| DBbeF     | 0.026         | 0.000             | 0.002  | 0.570         | 0.041  |
| N12bF     | 0.008         | 0.000             | 0.001  | 0.496         | 0.007  |
| N12kF     | 0.004         | 0.000             | 0.000  | 0.555         | 0.006  |
| DBaeF     | 0.011         | 0.000             | 0.001  | 0.570         | 0.004  |
| DBbkF     | 0.008         | 0.000             | 0.001  | 0.633         | 0.001  |
| DBakF     | 0.000         | 0.000             | 0.001  | 0.803         | 0.016  |
| DBjlF     | 0.010         | 0.000             | 0.003  | 0.547         | 0.114  |
| N12eP     | 0.009         | 0.000             | 0.003  | 0.335         | 0.061  |
| DBalP     | 0.004         | 0.000             | 0.014  | 0.820         | 0.000  |
| N23kF     | 0.000         | 0.000             | 0.003  | 0.768         | 0.003  |
| N12aP     | 0.002         | 0.000             | 0.001  | 0.510         | 0.025  |
| N23eP     | 0.018         | 0.000             | 0.001  | 0.266         | 0.035  |
| DBaeP     | 0.010         | 0.000             | 0.002  | 0.716         | 0.003  |
| N21aP     | 0.004         | 0.000             | 0.000  | 0.602         | 0.065  |
| DBelP     | 0.183         | 0.000             | 0.002  | 0.658         | 0.181  |
| N23aP     | 0.001         | 0.000             | 0.036  | 0.928         | 0.000  |
| BbPer     | 0.001         | 0.000             | 0.003  | 0.666         | 0.003  |
| DBaiP     | 0.001         | 0.000             | 0.003  | 0.838         | 0.026  |
| DBahP     | 0.006         | 0.000             | 0.001  | 1.000         | 0.269  |

86

87

88  
89 Table S3. Mean concentrations of four highly carcinogenic MW302 isomers (pg m<sup>-3</sup>)

| City              | Source       | DBaIP     | DBaeP  | DBaiP | DBahP | Reference  |
|-------------------|--------------|-----------|--------|-------|-------|------------|
| Qingyuan, China   | PM2.5        | 79        | 314    | 164   | 79    | This study |
| Beijing, China    | PM1.5        | ~1500     | ~15000 | ~5000 | ~2500 | 1          |
| Stockholm, Sweden | Air particle | 3.39      | 23.7   | 5.52  | 1.86  | 2          |
| Boston USA        | Air particle |           | 133    |       |       | 3          |
| Riverside, USA    | Air particle |           | 2.7    | < 0.5 | < 0.5 | 4          |
| Oporto, Portugal  | PM2.5/PM10   | 15.8/19.8 |        |       |       | 5          |

90  
91

92

Table S4. Average concentrations of PM2.5-bound priority PAHs (ng m<sup>-3</sup>)

| Compounds                     | Summer |        | Winter |        |
|-------------------------------|--------|--------|--------|--------|
|                               | Site A | Site B | Site A | Site B |
| acenaphthylene                | 0.02   | 0.03   | 0.06   | 0.05   |
| acenaphthene                  | 0.01   | 0.01   | 0.01   | 0.01   |
| fluorene                      | 0.04   | 0.05   | 0.09   | 0.10   |
| phenanthrene                  | 0.22   | 0.31   | 1.47   | 1.43   |
| anthracene                    | 0.04   | 0.05   | 0.10   | 0.05   |
| fluoranthene                  | 0.56   | 0.45   | 4.80   | 3.43   |
| pyrene                        | 0.81   | 0.55   | 4.45   | 2.09   |
| benz[a]anthracene (BaA)       | 0.40   | 0.21   | 2.01   | 0.82   |
| Chrysene (Chry)               | 0.76   | 0.42   | 4.07   | 2.22   |
| benzo[b]fluoranthene (BbF)    | 1.75   | 1.08   | 11.2   | 7.19   |
| benzo[k]fluoranthene (BkF)    | 0.81   | 0.44   | 5.10   | 2.36   |
| benzo[a]pyrene (BaP)          | 1.64   | 0.69   | 7.50   | 3.07   |
| indeno[cd]pyrene (IcdP)       | 5.72   | 2.41   | 22.7   | 12.6   |
| dibenzo[ah]anthracene (DBahA) | 0.87   | 0.51   | 4.62   | 2.65   |
| benzo[ghi]perylene            | 8.42   | 3.33   | 30.8   | 16.1   |
| Σ PAHs                        | 22.0   | 10.5   | 98.9   | 54.1   |

93

94

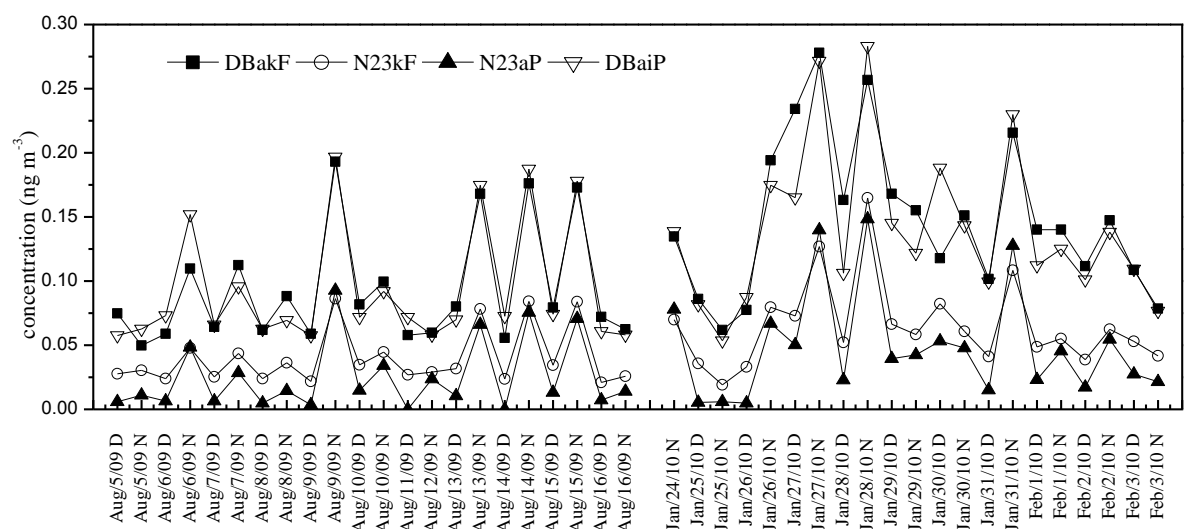

Figure S1. The diurnal variation of DBakF, N23kF, N23aP and DBaiP at site B

99     **References**

- 100     1. J. Layshock, S.M. Simonich and K.A. Anderson, *J. Environ. Monit.*, 2010, 12, 2290-2298.
- 101     2. C. Bergvall and R. Westerholm, *Environ. Sci. Technol.*, 2007, 41, 731-737.
- 102     3. J.O. Allen, J.L. Durant, N.M. Dookeran, K. Taghizadeh, E.F. Plummer, A.L. Lafleur, A.F.
- 103         Sarofim and K.A. Smith, *Environ. Sci. Technol.*, 1998, 32, 1928-1932.
- 104     4. R. Krieger and J. Wright, 1997. Ambient monitoring of selected PAHs in California, Air
- 105         and Waste Management Association 90th Annual Meeting and Exhibition, Ontario.
- 106     5. D. Castro, K. Slezakova, M.T. Oliva-Teles, C. Delerue-Matos, M.C. Alvim-Ferraz, S.
- 107         Morais, and M.C. Pereira, *J. Sep. Sci.*, 2009, 32, 501-510.

108
